# Supplementary material
Source: Springer Nature journal article supplement (https://www.springermedizin.de/resource/supplementary/12891_2005_169_MOESM5_ESM.pdf/9510654)
Supplement: MOESM5 [file 9510654]

**Figure 4 – STARD flow diagram.**

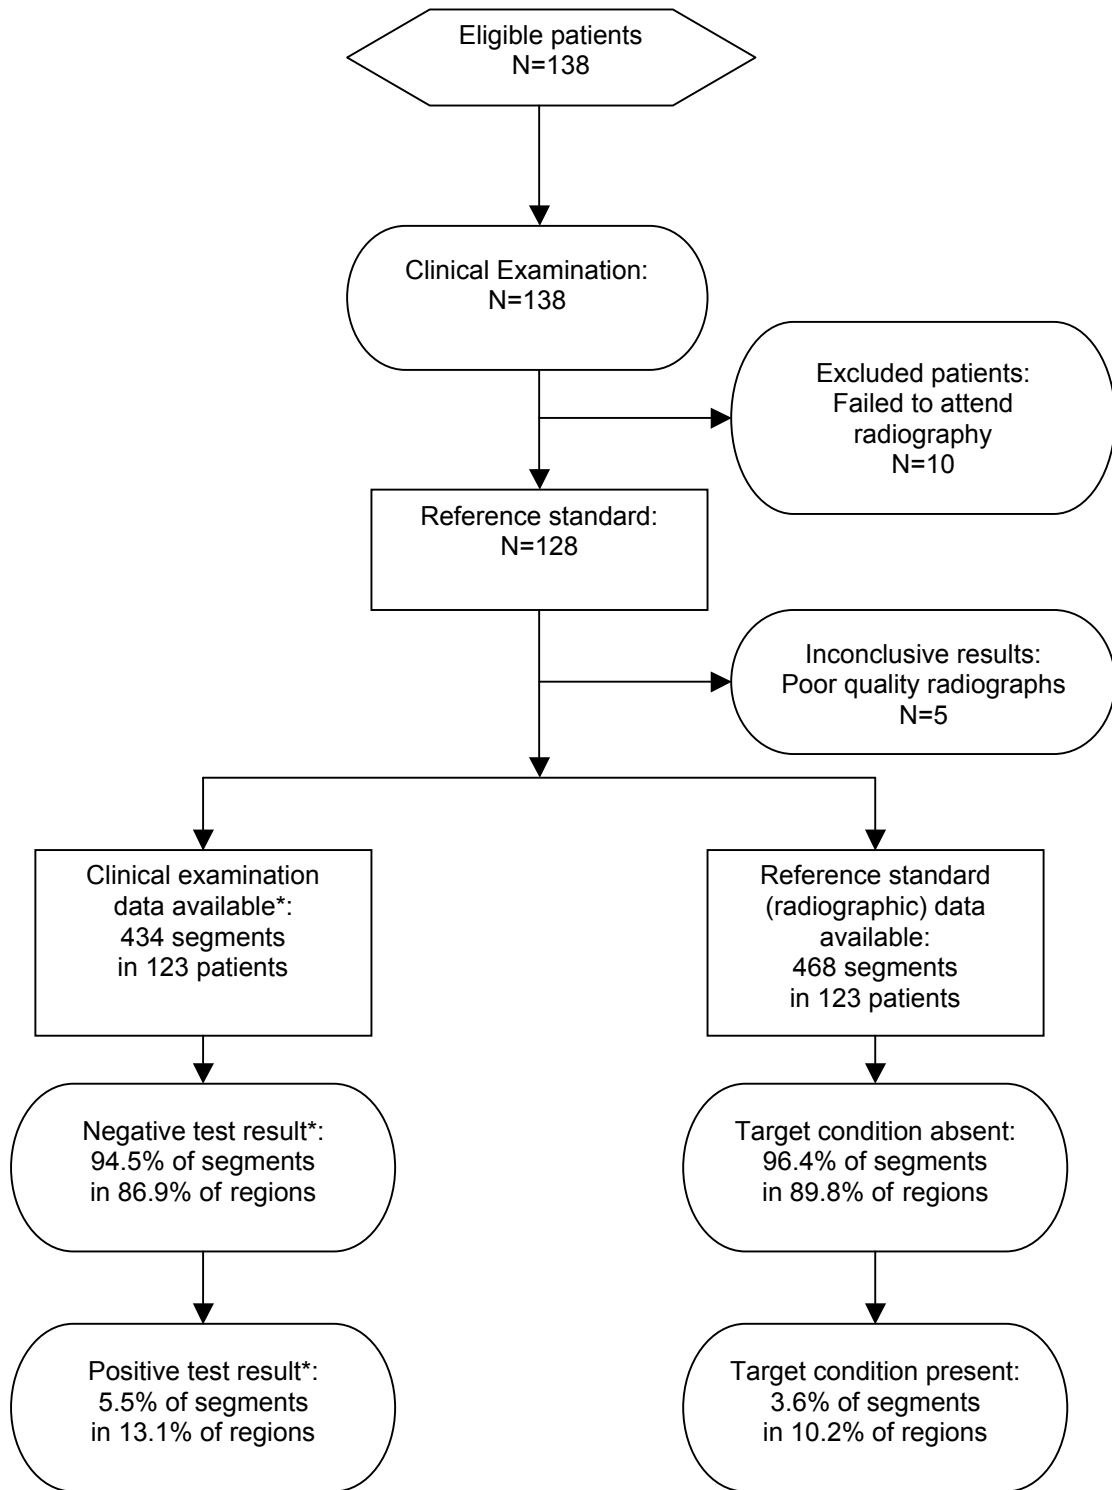

Note: STARD = standards for reporting diagnostic accuracy [25]; \* data are for PAIVM (central posteroanterior passive accessory intervertebral motion test) for translation LSI (lumbar segmental instability).
